# Supplementary material
Source: PubMed Central journal article supplement (PMC3605998)

Supplemental Table 1. Diet formulations<sup>†</sup>.

| Ingredients                              | 0.06% diet |            |            | 0.2% diet  |            |            | 0.6% diet  |            |            |
|------------------------------------------|------------|------------|------------|------------|------------|------------|------------|------------|------------|
|                                          | L          | 10         | M          | L          | 10         | M          | L          | 10         | M          |
|                                          | gm         |
| Casein                                   | 189.6      | 189.6      | 189.6      | 189.6      | 189.6      | 189.6      | 189.6      | 189.6      | 189.6      |
| L-Cystine                                | 2.8        | 2.8        | 2.8        | 2.8        | 2.8        | 2.8        | 2.8        | 2.8        | 2.8        |
| Corn Starch                              | 298.5      | 298.6      | 298.6      | 298.6      | 298.6      | 298.6      | 298.6      | 298.6      | 298.6      |
| Maltodextrin<br>10                       | 33.2       | 33.2       | 33.2       | 33.2       | 33.2       | 33.2       | 33.2       | 33.2       | 33.2       |
| Sucrose                                  | 331.7      | 331.8      | 331.8      | 331.8      | 331.8      | 331.8      | 331.8      | 331.8      | 331.8      |
| Cellulose                                | 47.4       | 47.4       | 47.4       | 47.4       | 47.4       | 47.4       | 47.4       | 47.4       | 47.4       |
| Soybean Oil                              | 23.1       | 23.1       | 23.1       | 21.7       | 21.7       | 21.7       | 17.7       | 17.7       | 17.7       |
| Lard                                     | 19.0       | 19.0       | 19.0       | 19.0       | 19.0       | 19.0       | 19.0       | 19.0       | 19.0       |
| Linoleic acid                            | <b>0.6</b> | <b>0.3</b> | 0          | <b>2.0</b> | <b>1.0</b> | 0          | <b>6.0</b> | <b>3.0</b> | 0          |
| 9,11 CLA                                 | 0          | 0          | <b>0.3</b> | 0          | 0          | <b>1.0</b> | 0          | 0          | <b>3.0</b> |
| 10,12 CLA                                | 0          | <b>0.3</b> | <b>0.3</b> | 0          | <b>1.0</b> | <b>1.0</b> | 0          | <b>3.0</b> | <b>3.0</b> |
| Mineral Mix<br>S10026                    | 9.5        | 9.5        | 9.5        | 9.5        | 9.5        | 9.5        | 9.5        | 9.5        | 9.5        |
| DiCalcium<br>Phosphate                   | 12.3       | 12.3       | 12.3       | 12.3       | 12.3       | 12.3       | 12.3       | 12.3       | 12.3       |
| Calcium<br>Carbonate                     | 5.2        | 5.2        | 5.2        | 5.2        | 5.2        | 5.2        | 5.2        | 5.2        | 5.2        |
| Potassium<br>Citrate, 1 H <sub>2</sub> O | 15.6       | 15.6       | 15.6       | 15.6       | 15.6       | 15.6       | 15.6       | 15.6       | 15.6       |
| Vitamin Mix<br>V10001                    | 9.5        | 9.5        | 9.5        | 9.5        | 9.5        | 9.5        | 9.5        | 9.5        | 9.5        |
| Choline<br>Bitartrate                    | 1.9        | 1.9        | 1.9        | 1.9        | 1.9        | 1.9        | 1.9        | 1.9        | 1.9        |
| Total                                    | 1000       | 1000       | 1000       | 1000       | 1000       | 1000       | 1000       | 1000       | 1000       |

<sup>†</sup>L, linoleic acid controls; 10, 10,12 CLA plus linoleic acid; M, 10,12 CLA plus 9,11 CLA.

Supplemental Table 2. Fat composition of the diet<sup>\*</sup>.

| Ingredients   | 0.06% diet |            |            | 0.2% diet  |             |             | 0.6% diet   |             |             |
|---------------|------------|------------|------------|------------|-------------|-------------|-------------|-------------|-------------|
|               | L          | 10         | M          | L          | 10          | M           | L           | 10          | M           |
|               | %          | %          | %          | %          | %           | %           | %           | %           | %           |
| Soybean Oil   | 54.1       | 54.1       | 54.1       | 50.8       | 50.8        | 50.8        | 41.4        | 41.4        | 41.4        |
| Lard          | 44.5       | 44.5       | 44.5       | 44.5       | 44.5        | 44.5        | 44.5        | 44.5        | 44.5        |
| Linoleic acid | <b>1.4</b> | <b>0.7</b> | 0          | <b>4.7</b> | <b>2.35</b> | 0           | <b>14.1</b> | <b>7.05</b> | 0           |
| 9,11 CLA      | 0          | 0          | <b>0.7</b> | 0          | 0           | <b>2.35</b> | 0           | 0           | <b>7.05</b> |
| 10,12 CLA     | 0          | <b>0.7</b> | <b>0.7</b> | 0          | <b>2.35</b> | <b>2.35</b> | 0           | <b>7.05</b> | <b>7.05</b> |

<sup>\*</sup> Data were expressed as a percentage of total fat. L, linoleic acid controls; 10, 10,12 CLA plus linoleic acid; M, 10,12 CLA plus 9,11 CLA.

Supplemental Table 3. Fatty acids analysis of the diets <sup>††</sup>.

|                  | 0.06% diet   |              |              | 0.2% diet    |              |              | 0.6% diet    |              |              |
|------------------|--------------|--------------|--------------|--------------|--------------|--------------|--------------|--------------|--------------|
|                  | <u>L</u>     | <u>10</u>    | <u>M</u>     | <u>L</u>     | <u>10</u>    | <u>M</u>     | <u>L</u>     | <u>10</u>    | <u>M</u>     |
| C14:0            | 0.027        | 0.033        | 0.017        | 0.027        | 0.033        | 0.027        | 0.028        | 0.023        | 0.024        |
| C16:0            | 0.509        | 0.607        | 0.359        | 0.525        | 0.605        | 0.502        | 0.460        | 0.468        | 0.462        |
| C16:1            | 0.032        | 0.038        | 0.021        | 0.033        | 0.038        | 0.032        | 0.033        | 0.029        | 0.029        |
| C18:0            | 0.171        | 0.226        | 0.157        | 0.201        | 0.231        | 0.188        | 0.152        | 0.174        | 0.188        |
| C18:1            | 0.800        | 0.987        | 0.606        | 0.858        | 0.972        | 0.827        | 0.704        | 0.766        | 0.746        |
| C18:2            | 1.521        | 1.822        | 1.023        | 1.652        | 1.787        | 1.515        | 1.685        | 1.452        | 1.228        |
| C18:3 (n6)       | 0.004        | 0.006        | 0.005        | 0.004        | 0.006        | 0.005        | 0.004        | 0.004        | 0.004        |
| C18:3 (n3)       | 0.198        | 0.243        | 0.137        | 0.188        | 0.232        | 0.206        | 0.158        | 0.136        | 0.150        |
| <b>9,11 CLA</b>  | <b>0.005</b> | <b>0.005</b> | <b>0.016</b> | <b>0.008</b> | <b>0.006</b> | <b>0.069</b> | <b>0.005</b> | <b>0.013</b> | <b>0.225</b> |
| <b>10,12 CLA</b> | <b>0.003</b> | <b>0.022</b> | <b>0.015</b> | <b>0.006</b> | <b>0.069</b> | <b>0.067</b> | <b>0.004</b> | <b>0.220</b> | <b>0.220</b> |
| C20:0            | 0.003        | 0.005        | 0.004        | 0.004        | 0.006        | 0.005        | 0.003        | 0.003        | 0.004        |
| C20:1            | 0.007        | 0.010        | 0.008        | 0.009        | 0.011        | 0.009        | 0.007        | 0.008        | 0.009        |
| C20:2            | 0.010        | 0.013        | 0.009        | 0.011        | 0.014        | 0.011        | 0.009        | 0.011        | 0.011        |
| Fat%             | 3.369        | 4.096        | 2.410        | 3.637        | 4.069        | 3.517        | 3.309        | 3.300        | 3.364        |

<sup>†</sup>Data were expressed as fatty acid g / 100 g diet. L, linoleic acid controls; 10, 10,12 CLA plus linoleic acid; M, 10,12 CLA plus 9,11 CLA.

<sup>††</sup>C20:3 (n6), C20:3 (n3), C20:4, C20:5, C22:0, C22:1, C22:2, C22:3, C22:4, C22:6, and C24:1 were underdetectable.

Supplemental Table 4. Fatty acid content of muscle.

| mg/g tissue      | 0.06% diet                     |                                 |                                 | 0.2% diet                       |                                |                                | 0.6% diet                       |                                 |                                |
|------------------|--------------------------------|---------------------------------|---------------------------------|---------------------------------|--------------------------------|--------------------------------|---------------------------------|---------------------------------|--------------------------------|
|                  | L                              | 10                              | M                               | L                               | 10                             | M                              | L                               | 10                              | M                              |
| C12:0            | 0.03 ± 0.01                    | 0.01 ± 0.00                     | 0.02 ± 0.00                     | 0.04 ± 0.02                     | 0.02 ± 0.00                    | 0.03 ± 0.00                    | 0.02 ± 0.00                     | 0.01 ± 0.00                     | 0.01 ± 0.00                    |
| C14:0            | 0.63 ± 0.14 <sup>a</sup>       | 0.30 ± 0.02 <sup>abc</sup>      | 0.36 ± 0.04 <sup>abc</sup>      | 0.63 ± 0.19 <sup>a</sup>        | 0.48 ± 0.07 <sup>ab</sup>      | 0.67 ± 0.07 <sup>a</sup>       | 0.33 ± 0.05 <sup>abc</sup>      | 0.07 ± 0.01 <sup>c</sup>        | 0.12 ± 0.04 <sup>bc</sup>      |
| C14:1            | 0.18 ± 0.05                    | 0.08 ± 0.01                     | 0.11 ± 0.02                     | 0.15 ± 0.03                     | 0.13 ± 0.02                    | 0.18 ± 0.02                    | 0.09 ± 0.02                     | 0.01 ± 0.00                     | 0.01 ± 0.00                    |
| C15:0            | 0.05 ± 0.01                    | 0.03 ± 0.00                     | 0.03 ± 0.00                     | 0.04 ± 0.01                     | 0.04 ± 0.01                    | 0.05 ± 0.00                    | 0.03 ± 0.00                     | 0.02 ± 0.00                     | 0.02 ± 0.00                    |
| C16:0            | 6.0 ± 1.5 <sup>a</sup>         | 3.2 ± 0.2 <sup>ab</sup>         | 3.4 ± 0.3 <sup>ab</sup>         | 5.1 ± 0.9 <sup>a</sup>          | 3.8 ± 0.4 <sup>ab</sup>        | 4.7 ± 0.4 <sup>ab</sup>        | 3.4 ± 0.3 <sup>ab</sup>         | 1.6 ± 0.1 <sup>b</sup>          | 2.9 ± 1.1 <sup>ab</sup>        |
| C16:1            | 5.1 ± 1.1                      | 2.5 ± 0.2                       | 3.1 ± 0.4                       | 4.4 ± 0.8                       | 3.8 ± 0.6                      | 5.0 ± 0.5                      | 2.8 ± 0.4                       | 0.4 ± 0.1                       | 0.8 ± 0.3                      |
| C17:1            | 0.08 ± 0.01                    | 0.04 ± 0.00                     | 0.05 ± 0.01                     | 0.07 ± 0.01                     | 0.07 ± 0.01                    | 0.08 ± 0.01                    | 0.05 ± 0.01                     | 0.01 ± 0.00                     | 0.03 ± 0.01                    |
| C18:0            | 0.77 ± 0.23                    | 0.8 ± 0.04                      | 0.60 ± 0.03                     | 0.68 ± 0.04                     | 0.56 ± 0.05                    | 0.59 ± 0.03                    | 0.67 ± 0.03                     | 0.54 ± 0.02                     | 0.56 ± 0.09                    |
| C18:1c           | 8.1 ± 2.0                      | 3.8 ± 0.3                       | 4.5 ± 0.5                       | 5.5 ± 0.7                       | 5.4 ± 0.7                      | 6.8 ± 0.8                      | 4.3 ± 0.5                       | 1.5 ± 0.1                       | 3.5 ± 1.5                      |
| C18:2c           | 4.5 ± 1.1                      | 2.0 ± 0.2                       | 2.4 ± 0.3                       | 3.1 ± 0.5                       | 2.8 ± 0.4                      | 3.6 ± 0.4                      | 2.5 ± 0.4                       | 0.7 ± 0.1                       | 0.9 ± 0.2                      |
| C18:2t           | 0.03 ± 0.01                    | 0.01 ± 0.00                     | 0.01 ± 0.00                     | 0.01 ± 0.00                     | 0.03 ± 0.01                    | 0.01 ± 0.00                    | 0.01 ± 0.00                     | 0.01 ± 0.00                     | 0.02 ± 0.01                    |
| <b>9,11 CLA</b>  | <b>0.07 ± 0.01<sup>b</sup></b> | <b>0.03 ± 0.00<sup>b</sup></b>  | <b>0.05 ± 0.01<sup>b</sup></b>  | <b>0.05 ± 0.01<sup>b</sup></b>  | <b>0.05 ± 0.01<sup>b</sup></b> | <b>0.14 ± 0.03<sup>a</sup></b> | <b>0.03 ± 0.00<sup>b</sup></b>  | <b>0.01 ± 0.00<sup>b</sup></b>  | <b>0.06 ± 0.02<sup>b</sup></b> |
| <b>10,12 CLA</b> | <b>0.04 ± 0.01<sup>b</sup></b> | <b>0.02 ± 0.00<sup>ab</sup></b> | <b>0.03 ± 0.00<sup>ab</sup></b> | <b>0.02 ± 0.00<sup>ab</sup></b> | <b>0.06 ± 0.01<sup>a</sup></b> | <b>0.06 ± 0.01<sup>a</sup></b> | <b>0.02 ± 0.00<sup>ab</sup></b> | <b>0.03 ± 0.00<sup>ab</sup></b> | <b>0.04 ± 0.01<sup>b</sup></b> |
| C18:3n3          | 0.33 ± 0.09                    | 0.12 ± 0.01                     | 0.15 ± 0.02                     | 0.28 ± 0.09                     | 0.17 ± 0.03                    | 0.21 ± 0.03                    | 0.13 ± 0.03                     | 0.03 ± 0.01                     | 0.04 ± 0.01                    |
| C18:3n6          | 0.08 ± 0.02                    | 0.05 ± 0.00                     | 0.05 ± 0.00                     | 0.05 ± 0.01                     | 0.06 ± 0.02                    | 0.05 ± 0.00                    | 0.05 ± 0.00                     | 0.05 ± 0.00                     | 0.06 ± 0.01                    |
| C20:1            | 0.07 ± 0.02                    | 0.04 ± 0.00                     | 0.04 ± 0.00                     | 0.05 ± 0.01                     | 0.06 ± 0.01                    | 0.06 ± 0.01                    | 0.04 ± 0.00                     | 0.03 ± 0.00                     | 0.05 ± 0.02                    |
| C20:2            | 0.08 ± 0.03                    | 0.04 ± 0.00                     | 0.04 ± 0.00                     | 0.05 ± 0.01                     | 0.09 ± 0.04                    | 0.05 ± 0.00                    | 0.04 ± 0.00                     | 0.03 ± 0.01                     | 0.04 ± 0.01                    |
| C20:3n6          | 0.08 ± 0.05                    | 0.05 ± 0.00                     | 0.03 ± 0.00                     | 0.05 ± 0.00                     | 0.04 ± 0.01                    | 0.04 ± 0.00                    | 0.04 ± 0.00                     | 0.03 ± 0.00                     | 0.04 ± 0.01                    |
| C20:4n6          | 0.80 ± 0.46                    | 0.57 ± 0.03                     | 0.38 ± 0.03                     | 0.62 ± 0.06                     | 0.37 ± 0.04                    | 0.43 ± 0.02                    | 0.58 ± 0.06                     | 0.39 ± 0.02                     | 0.42 ± 0.06                    |
| C22:5            | 0.13 ± 0.03                    | 0.17 ± 0.01                     | 0.12 ± 0.01                     | 0.14 ± 0.03                     | 0.12 ± 0.02                    | 0.14 ± 0.01                    | 0.21 ± 0.02                     | 0.17 ± 0.02                     | 0.16 ± 0.03                    |
| C22:6n3          | 0.62 ± 0.26                    | 0.54 ± 0.04                     | 0.39 ± 0.05                     | 0.65 ± 0.07                     | 0.33 ± 0.05                    | 0.42 ± 0.33                    | 0.59 ± 0.08                     | 0.31 ± 0.02                     | 0.32 ± 0.05                    |
| C24:0            | 0.04 ± 0.01                    | 0.06 ± 0.01                     | 0.04 ± 0.00                     | 0.06 ± 0.01                     | 0.04 ± 0.01                    | 0.05 ± 0.01                    | 0.06 ± 0.01                     | 0.04 ± 0.00                     | 0.04 ± 0.01                    |
| SAT              | 7.5 ± 1.8                      | 4.4 ± 0.2                       | 4.5 ± 0.3                       | 6.6 ± 1.1                       | 5.0 ± 0.5                      | 6.1 ± 0.5                      | 4.5 ± 0.4                       | 2.3 ± 0.1                       | 3.6 ± 1.2                      |
| MUFA             | 13.4 ± 2.7                     | 6.5 ± 0.5                       | 7.9 ± 0.9                       | 9.6 ± 1.2                       | 9.4 ± 1.3                      | 12.1 ± 1.3                     | 7.2 ± 0.1                       | 2.0 ± 0.2                       | 4.4 ± 1.9                      |
| PUFA             | 6.8 ± 1.9                      | 3.6 ± 0.3                       | 3.6 ± 0.4                       | 4.7 ± 0.6                       | 4.1 ± 0.5                      | 5.1 ± 0.5                      | 4.2 ± 0.5                       | 1.8 ± 0.1                       | 2.1 ± 0.4                      |

<sup>a</sup> Means ± SEM, not sharing a common letter within the same row differ (p<0.05). L, linoleic acid controls; 10, 10,12 CLA plus linoleic acid; M, 10,12 CLA plus 9,11 CLA.

Supplemental Table 5. The effects of CLA on body weight gain (BWG), food intake (FI), food conversion efficiency (FCE), fasting blood glucose (BG), glucose tolerance test (GTT) area under the curve (AUC), fasting insulin, and HOMA-IR index.

| Diets       | Total BWG (g)            | Total FI (per cage, g) | FCE (per cage)          | Fasting BG (mg/dL) | GTT AUC      | Fasting insulin (ng/mL)   | HOMA-IR index |
|-------------|--------------------------|------------------------|-------------------------|--------------------|--------------|---------------------------|---------------|
| Type        | < 0.0001                 | 0.0003                 | < 0.0001                | 0.3661             | 0.7136       | 0.7590                    | 0.9649        |
| Dose        | < 0.0001                 | 0.9844                 | < 0.0001                | 0.2580             | 0.5534       | 0.0640                    | 0.0378        |
| Interaction | < 0.0001                 | 0.6104                 | 0.0016                  | 0.1085             | 0.5043       | 0.0412                    | 0.0956        |
| 0.06 L      | 5.7 ± 0.1 <sup>ab</sup>  | 276 ± 3.0              | 25.1 ± 1.5 <sup>b</sup> | 78.1 ± 3.8         | 23640 ± 808  | 0.51 ± 0.11 <sup>ab</sup> | 2.35 ± 0.55   |
| 0.06 10     | 5.5 ± 0.1 <sup>abc</sup> | 265 ± 3.9              | 24.2 ± 0.9 <sup>b</sup> | 74.8 ± 2.6         | 23344 ± 919  | 0.39 ± 0.05 <sup>b</sup>  | 1.69 ± 0.21   |
| 0.06 M      | 5.0 ± 0.2 <sup>abc</sup> | 269 ± 4.1              | 28.3 ± 2.4 <sup>b</sup> | 73.4 ± 3.8         | 21418 ± 995  | 0.53 ± 0.09 <sup>ab</sup> | 2.31 ± 0.48   |
| 0.2 L       | 6.2 ± 0.2 <sup>a</sup>   | 280 ± 2.4              | 22.8 ± 1.3 <sup>b</sup> | 79.8 ± 2.1         | 23112 ± 1124 | 0.60 ± 0.11 <sup>ab</sup> | 2.85 ± 0.54   |
| 0.2 10      | 3.9 ± 0.1 <sup>cde</sup> | 261 ± 4.7              | 33.6 ± 1.4 <sup>b</sup> | 75.6 ± 4.7         | 24082 ± 1000 | 0.44 ± 0.08 <sup>ab</sup> | 1.96 ± 0.37   |
| 0.2 M       | 4.4 ± 0.1 <sup>bcd</sup> | 270 ± 2.2              | 31.2 ± 1.6 <sup>b</sup> | 78.5 ± 4.0         | 23230 ± 1084 | 0.47 ± 0.06 <sup>ab</sup> | 2.22 ± 0.35   |
| 0.6 L       | 6.4 ± 0.1 <sup>a</sup>   | 282 ± 2.1              | 22.2 ± 0.8 <sup>b</sup> | 74.6 ± 2.8         | 22193 ± 469  | 0.49 ± 0.09 <sup>ab</sup> | 2.28 ± 0.50   |
| 0.6 10      | 2.8 ± 0.1 <sup>de</sup>  | 262 ± 2.5              | 52.1 ± 5.2 <sup>a</sup> | 77.9 ± 4.8         | 22436 ± 1126 | 0.94 ± 0.21 <sup>a</sup>  | 4.20 ± 0.98   |
| 0.6 M       | 2.6 ± 0.1 <sup>e</sup>   | 264 ± 2.3              | 53.7 ± 4.7 <sup>a</sup> | 89.5 ± 4.9         | 23194 ± 1350 | 0.60 ± 0.09 <sup>ab</sup> | 3.18 ± 0.64   |

Means ± SEM without a common letter in the same column differ (p<0.05). L, linoleic acid controls; 10, 10,12 CLA plus linoleic acid; M, 10,12 CLA plus 9,11 CLA.

Supplemental Table 6. Probability levels for the main effects of fatty acid type and dose and their interactions for the experimental outcomes.

| Dependent variable | Type     | Dose     | Interaction | Dependent variable | Type     | Dose     | Interaction |
|--------------------|----------|----------|-------------|--------------------|----------|----------|-------------|
| <b>Fig 1</b>       |          |          |             | <b>Fig 7A</b>      |          |          |             |
| EPI                | < 0.0001 | < 0.0001 | < 0.0001    | PPAR $\gamma$      | < 0.0001 | < 0.0001 | < 0.0001    |
| ING                | < 0.0001 | < 0.0001 | < 0.0001    | Perilipin          | < 0.0001 | 0.0093   | < 0.0001    |
| MEN                | < 0.0001 | < 0.0001 | 0.0007      | FABP4              | < 0.0001 | 0.2678   | < 0.0001    |
| RET                | < 0.0001 | < 0.0001 | 0.0002      | HSL                | 0.0004   | < 0.0001 | < 0.0001    |
| Total WAT          | < 0.0001 | < 0.0001 | < 0.0001    | ATGL               | 0.0007   | < 0.0001 | < 0.0001    |
| BAT                | < 0.0001 | < 0.0001 | 0.0002      | <b>Fig 7B</b>      |          |          |             |
| <b>Fig 2B</b>      |          |          |             | PPAR $\gamma$      | 0.8922   | < 0.0001 | 0.0002      |
| Liver Weight       | < 0.0001 | < 0.0001 | < 0.0001    | Perilipin          | < 0.0001 | < 0.0001 | < 0.0001    |
| Liver TG           | < 0.0001 | < 0.0001 | < 0.0001    | FABP4              | 0.0039   | 0.0173   | < 0.0001    |
| <b>Fig 3</b>       |          |          |             | HSL                | 0.0398   | < 0.0001 | 0.0012      |
| MCP1               | 0.0142   | < 0.0001 | 0.0044      | ATGL               | 0.7346   | < 0.0001 | 0.001       |
| IL6                | < 0.0001 | 0.001    | 0.0019      | <b>Fig 8A</b>      |          |          |             |
| Serum TG           | < 0.0001 | < 0.0001 | < 0.0001    | GPR120             | < 0.0001 | 0.313    | < 0.0001    |
| <b>Fig 4A</b>      |          |          |             | GPR40              | 0.0443   | 0.3533   | 0.0132      |
| UCP1               | < 0.0001 | < 0.0001 | < 0.0001    | <b>Fig 8B</b>      |          |          |             |
| Elov3              | < 0.0001 | 0.0001   | 0.0706      | GPR120             | 0.5264   | < 0.0001 | < 0.0001    |
| Cidea              | < 0.0001 | < 0.0001 | < 0.0001    | GPR40              | < 0.0001 | < 0.0001 | 0.0433      |
| CPT1b              | < 0.0001 | < 0.0001 | < 0.0001    | <b>Suppl Fig 1</b> |          |          |             |
| Cox8b              | < 0.0001 | < 0.0001 | < 0.0001    | UCP1               | 0.8595   | 0.0022   | 0.1126      |
| PPAR $\alpha$      | < 0.0001 | < 0.0001 | < 0.0001    | Elov3              | < 0.0001 | < 0.0001 | < 0.0001    |
| COX2               | < 0.0001 | < 0.0001 | < 0.0001    | Cidea              | 0.0792   | < 0.0001 | < 0.0001    |
| PGF2 $\alpha$      | < 0.0001 | < 0.0001 | < 0.0001    | CPT1b              | 0.0012   | < 0.0001 | 0.0001      |
| <b>synthase</b>    |          |          |             | Cox8b              | < 0.0001 | < 0.0001 | < 0.0001    |
| TMEM26             | < 0.0001 | < 0.0001 | < 0.0001    | PPAR $\alpha$      | 0.0033   | < 0.0001 | < 0.0001    |
| <b>Fig 4B</b>      |          |          |             | COX2               | 0.0013   | < 0.0001 | < 0.0001    |
| UCP1               | 0.0012   | < 0.0001 | < 0.0001    | PGF2 $\alpha$      | < 0.0001 | 0.0011   | 0.0422      |
| Elov3              | 0.0629   | 0.019    | < 0.0001    | <b>synthase</b>    |          |          |             |
| Cidea              | 0.2104   | < 0.0001 | < 0.0001    | TMEM26             | < 0.001  | < 0.001  | < 0.001     |
| CPT1b              | 0.0002   | < 0.0001 | < 0.0001    | <b>Suppl Fig 2</b> |          |          |             |
| Cox8b              | < 0.0001 | 0.0019   | 0.0003      | MCP1               | < 0.0001 | < 0.0001 | < 0.0001    |
| PPAR $\alpha$      | < 0.0001 | < 0.0001 | < 0.0001    | TNF $\alpha$       | < 0.0001 | < 0.0001 | < 0.0001    |
| COX2               | < 0.0001 | 0.0003   | < 0.0001    | F4/80              | < 0.0001 | < 0.0001 | < 0.0001    |
| PGF2 $\alpha$      | < 0.0001 | < 0.0001 | < 0.0001    | IL6                | < 0.0001 | < 0.0001 | < 0.0001    |
| <b>synthase</b>    |          |          |             | Arginase 1         | < 0.0001 | < 0.0001 | < 0.0001    |
| TMEM26             | < 0.0001 | < 0.0001 | 0.0175      | Mrc 1              | < 0.0001 | < 0.0001 | < 0.0001    |
| <b>Fig 6A</b>      |          |          |             | Clec 10            | < 0.0001 | 0.036    | 0.0164      |
| MCP1               | < 0.0001 | < 0.0001 | < 0.0001    | <b>Suppl Fig 3</b> |          |          |             |
| TNF $\alpha$       | < 0.0001 | < 0.0001 | < 0.0001    | PPAR $\gamma$      | 0.0466   | < 0.0001 | < 0.0001    |
| F4/80              | < 0.0001 | < 0.0001 | < 0.0001    | Perilipin          | < 0.0001 | < 0.0001 | < 0.0001    |
| IL6                | < 0.0001 | < 0.0001 | < 0.0001    | FABP4              | 0.0003   | < 0.0001 | < 0.0001    |
| Arginase 1         | < 0.0001 | < 0.0001 | < 0.0001    | HSL                | 0.0631   | < 0.0001 | 0.0001      |
| Mrc 1              | < 0.0001 | < 0.0001 | < 0.0001    | ATGL               | 0.0368   | < 0.0001 | 0.0022      |
| Clec 10            | < 0.0001 | < 0.0001 | < 0.0001    | <b>Suppl Fig 4</b> |          |          |             |
| <b>Fig 6B</b>      |          |          |             | GPR120             | < 0.0001 | < 0.0001 | < 0.0001    |
| MCP1               | < 0.0001 | < 0.0001 | < 0.0001    | GPR40              | 0.0044   | 0.0229   | 0.0635      |
| TNF $\alpha$       | < 0.0001 | < 0.0001 | 0.0001      |                    |          |          |             |
| F4/80              | < 0.0001 | < 0.0001 | < 0.0001    |                    |          |          |             |
| IL6                | < 0.0001 | 0.1794   | 0.0003      |                    |          |          |             |
| Arginase 1         | 0.2374   | 0.2133   | 0.4565      |                    |          |          |             |
| Mrc 1              | < 0.0001 | 0.0535   | < 0.0001    |                    |          |          |             |
| Clec 10            | < 0.0001 | 0.1012   | 0.0028      |                    |          |          |             |

**Supplemental Fig. 1.** Differential effects of CLA dose and treatments on markers of browning in retroperitoneal (RET) WAT. Panel A; direct markers of browning. Panel B; markers of prostaglandin production that are associated with the activation of browning. mRNA levels of markers of brown fat-like adipocytes were measured in RET WAT by real time qPCR. Means  $\pm$  SEM without a common letter differ ( $P < 0.05$ ). L, linoleic acid; 10, 10,12 CLA plus linoleic acid; M, 10,12 CLA plus 9,11 CLA; UCP-1, uncoupling protein 1; Elovl3, elongation of very long chain fatty acids 3; Cidea, cell death-induced DNA fragmentation factor-a-like effector A; CPT-1b, carnitine palmitoyltransferase 1 b; Cox8b, cytochrome c oxidase subunit VIII b; PPAR $\alpha$ , proliferator-activated receptor alpha; TMEM26, transmembrane protein 26; COX-2, cyclooxygenase-2; PGF2 $\alpha$ , prostaglandin F2 alpha.

**Supplemental Fig. 2.** Intermediate and high dose of CLA treatments increase marker of low grade inflammation in retroperitoneal (RET) WAT. Panel A; markers of classically-activated M1 macrophage. Panel B; markers of alternatively-activated M2 macrophage. mRNA levels of markers of low grade inflammation were measured in RET WAT by real time qPCR. Means  $\pm$  SEM without a common letter differ ( $P < 0.05$ ). L, linoleic acid; 10, 10,12 CLA plus linoleic acid; M, 10,12 CLA plus 9,11 CLA; COX-2, cyclooxygenase 2; MCP-1, monocyte chemoattractant protein 1; IL-6, interleukin 6; TNF $\alpha$  = tumor necrosis factor alpha

**Supplemental Fig. 3.** Differential effects of CLA dose and treatments on markers of lipogenesis and lipolysis in retroperitoneal (RET) WAT. mRNA levels of markers of lipogenesis (Panel A) and lipolysis (Panel B) were measured in RET WAT by real time qPCR. Means  $\pm$  SEM without a common letter differ ( $P < 0.05$ ). L, linoleic acid; 10, 10,12 CLA plus linoleic acid; M, 10,12

CLA plus 9,11 CLA; PPAR $\alpha$ , peroxisome proliferator-activated receptor alpha; FABP4, fatty acid binding protein 4; HSL, hormone sensitive lipase; ATGL, adipose tissue TG lipase.

**Supplemental Fig. 4.** FFA receptors GPR120 and 40 in retroperitoneal (RET) WAT are differentially regulated by CLA. mRNA levels of markers of GPR 120 and 40 were in RET WAT measured by real time qPCR. Means  $\pm$  SEM without a common letter differ (P<0.05). L, linoleic acid; 10, 10,12 CLA plus linoleic acid; M, 10,12 CLA plus 9,11 CLA; GPR, G protein receptor



Supplemental Fig 1.

A-RET

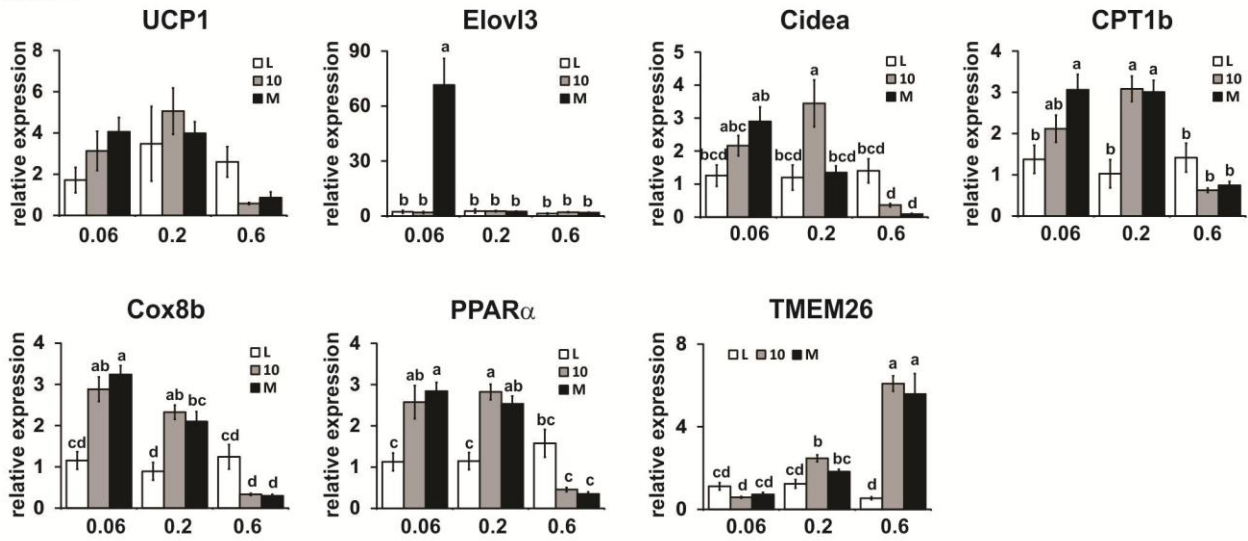

B-RET

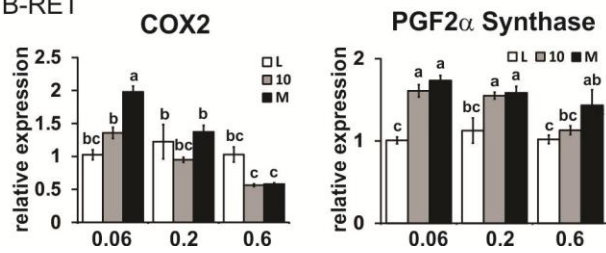

Supplemental Fig 2.

A-RET

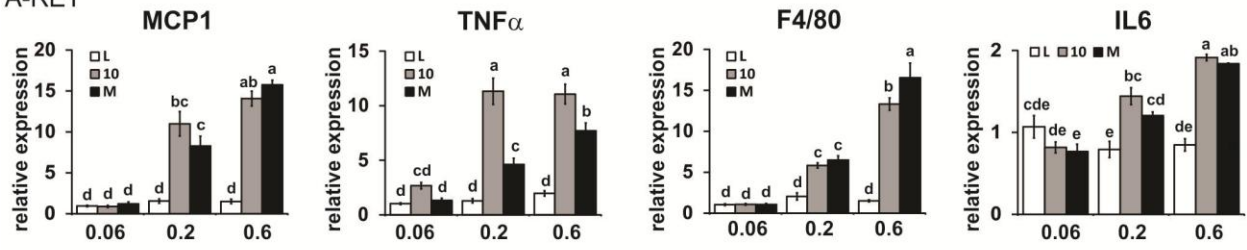

B-RET

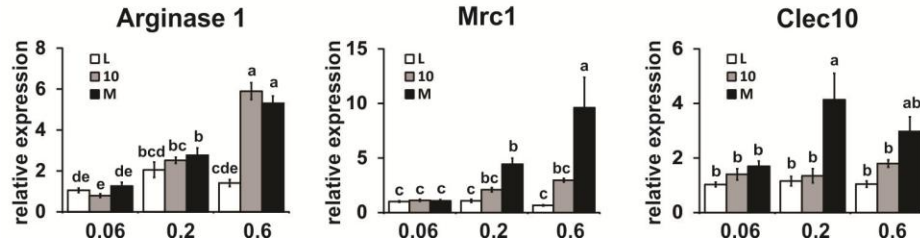

Supplemental Fig 3.

A-RET

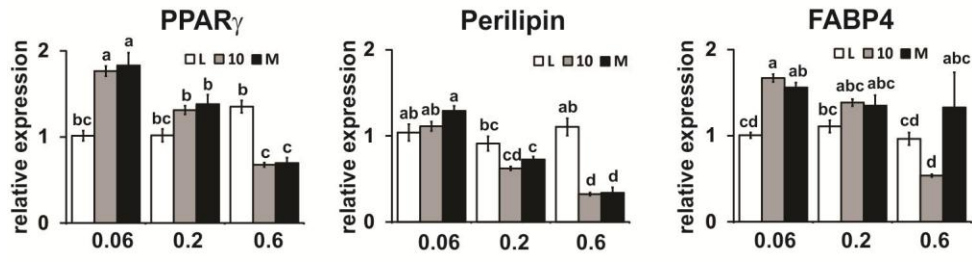

B-RET

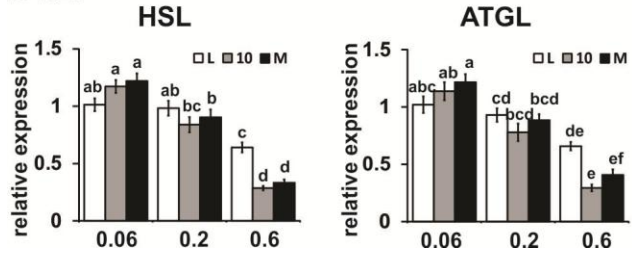

Supplemental Fig 4.

RET

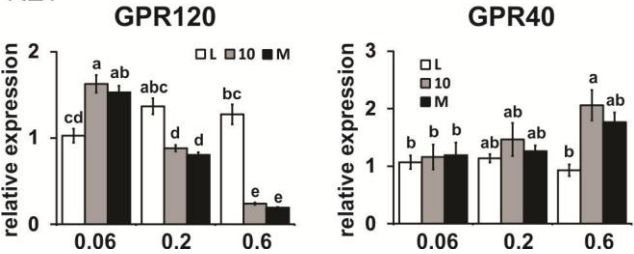

Supplement: supp_M030924_jlr.M030924-1.pdf [file supp_M030924_jlr.M030924-1.pdf]
